# Supplementary material
Source: PubMed Central journal article supplement (PMC4612499)
Supplement: NIHMS727948-supplement-Supp_TableS1___FigureS1-S2.pdf [file NIHMS727948-supplement-Supp_TableS1___FigureS1-S2.pdf]

**Supplemental Figure 1:** OS of newly diagnosed AML patients with intermediate-risk cytogenetics and age < 60 only  
IDH+/NPM1+ compared to IDH+ alone

(a) IDH+/NPM1+ compared to IDH+ alone

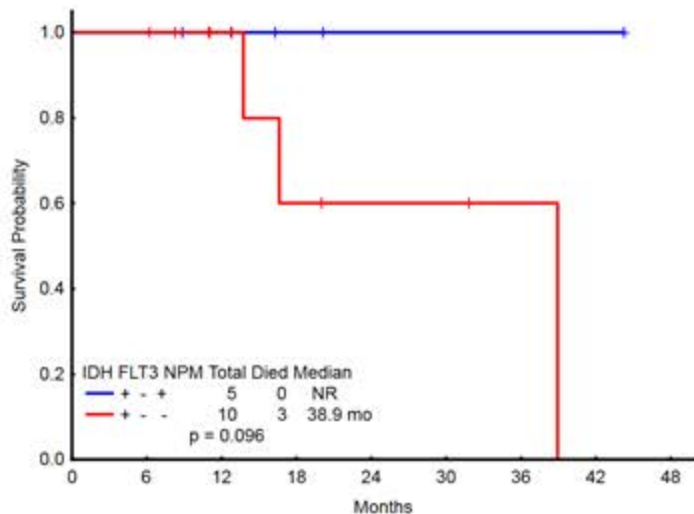

(b) IDH+/NPM1+ compared to NPM1+ alone

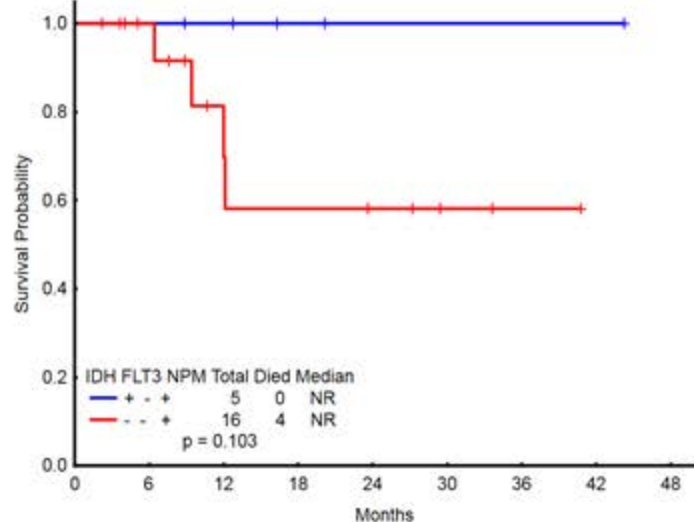

Supplemental Figure 2: Overall survival of AML patients receiving hypomethylating agent-based induction therapy by IDH status

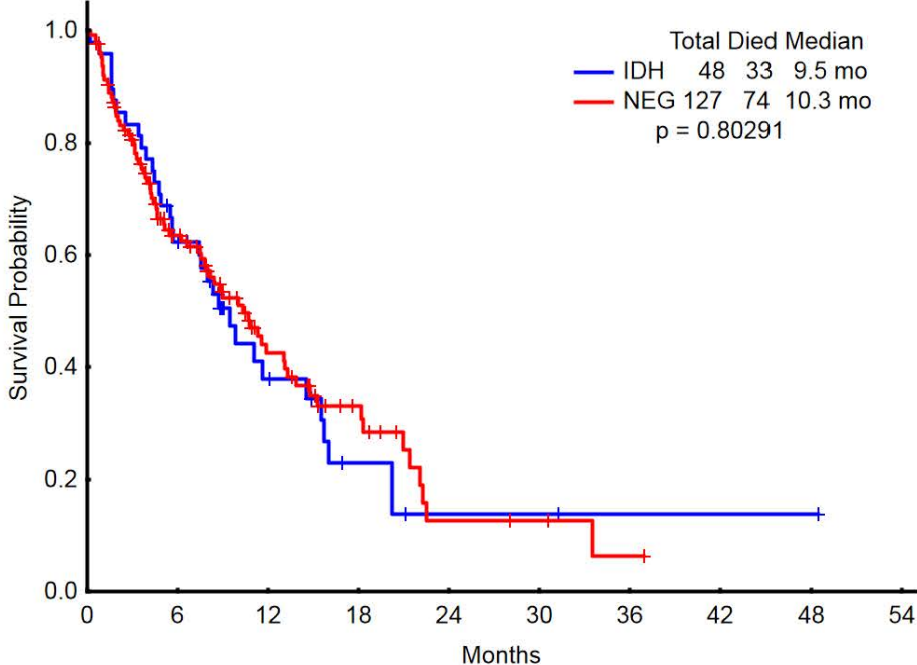

**Supplemental Table I : Treatments received by induction and salvage treatment status**

|                                                                                               | <b>Induction</b> | <b>S1</b> | <b>S2+</b> |
|-----------------------------------------------------------------------------------------------|------------------|-----------|------------|
| <b>High-dose cytarabine based</b><br>(e.g. IA, FIA, CIA, FLAG-IDA, +/- sorafenib)             | 273              | 39        | 58         |
| <b>7+3 based</b>                                                                              | 5                | 0         | 0          |
| <b>HMA-based</b><br>(e.g. 5-day DAC, 10-day DAC, AZA, DAC + vosaroxin, SGI-110, sapacitabine) | 175              | 34        | 40         |
| <b>Cladribine + low-dose cytarabine</b>                                                       | 54               | 1         | 0          |
| <b>Clofarabine + low-dose cytarabine</b>                                                      | 24               | 2         | 1          |
| <b>Other low-dose cytarabine based regimen</b>                                                | 15               | 26        | 4          |
| <b>Other</b><br>(e.g. AC220, ASP2215, EPZ-5676, Crenolanib)                                   | 16               | 5         | 38         |
